# Supplementary material for: Buckycolumn electrodes: a practical and improved alternative to conventional materials utilised for biological electrochemical monitoring
Source: Royal Society of Chemistry journal article supplement (doi:10.1039/c3tb20802h), 2013-01-01
Supplement: c3tb20802h.pdf [file c3tb20802h.pdf]

1 **Supporting Information for**

2  
3 **Buckycolumn electrodes: an improved alternative to conventional**  
4 **materials utilised for biological electrochemical monitoring**

5  
6 Aidan Fagan-Murphy<sup>1</sup>, Raymond L.D. Whitby<sup>2</sup> & Bhavik Anil Patel<sup>1,\*</sup>

7  
8 <sup>1</sup>School of Pharmacy and Biomolecular Sciences, University of Brighton, Brighton, BN2 4GJ

9 <sup>2</sup>Nanoscience and Nanotechnology Group, University of Brighton, Brighton, BN2 4GJ

10  
11  
12 **Experimental Section**

13  
14 *Fabrication of CNT-based BC electrodes:* The fabrication of the BC material has been  
15 described elsewhere<sup>21</sup>. Briefly, MWCNT (Supplied by “TMSpetsmash”20-30 nm diameter,  
16 >> 1 µm length) nanotubes were dispersed in methanol to disaggregate the CNTs, poured  
17 between two polyethylene frits, compressed to remove the solvent and then dried in air. For  
18 the construction of the electrode, the BC material was attached to a copper wire using silver  
19 epoxy. This entire piece was then encased in epoxy resin to provide a solid device for ease of  
20 use. Following this the electrochemically active surface as exposed by cutting using a  
21 diamond wafer blade (Buehler saw) Following preparation of the BC electrode, it was stored  
22 in 1 M KCl.

23 *Electrochemical Measurements:* All electrochemical experiments were carried out  
24 using a CHI 630B potentiostat (CHI Instruments, Austin, Texas, USA). A three electrode  
25 setup was employed for all electrochemical studies using a platinum wire counter electrode  
26 and an Ag|AgCl (3 M KCl) reference electrode. The working electrode was either a boron-  
27 doped diamond (BDD) electrode (Winsor scientific LTD, diameter 3mm, boron doping level:  
28 ≈0.1%, resistivity: 7.5x10<sup>-4</sup> Ωm), a glassy carbon (GC) electrode (CHI Instruments, Austin,  
29 Texas, USA, diameter 3mm) or a CNT-based BC electrode described in section 2.2. Prior to  
30 electrochemical studies, the commercial electrodes were polished for 5 minutes with 0.05µm  
31 grade alumina aqueous slurry; this procedure was carried out before each experimental run.  
32 For fouling studies measurements were carried out in 1 mM dopamine in 0.1 M PBS buffer at

33 a scan rate of  $100 \text{ mV s}^{-1}$ , after an initial unstable period of fouling for approximately 2  
34 minutes the system entered a more stable region where analysis was performed. Additional  
35 fouling experiments were carried out to observe effects of 5 % bovine serum albumin on  
36 electrode performance.

37 *Data analysis:* Electrochemical data analysis was carried out using the CHI 630B  
38 software. Electrochemical characteristics, peak current and peak potential were measured  
39 from the experimental data and compared between the three electrodes. The effective surface  
40 area of all electrodes was calculated from the oxidation peak current of 1 mM potassium  
41 ferricyanide in 1 M KCl through the Randles-Sevick equation. For fouling studies, a 2-way  
42 ANOVA analysis was utilised to compare the performance of the three electrodes

43

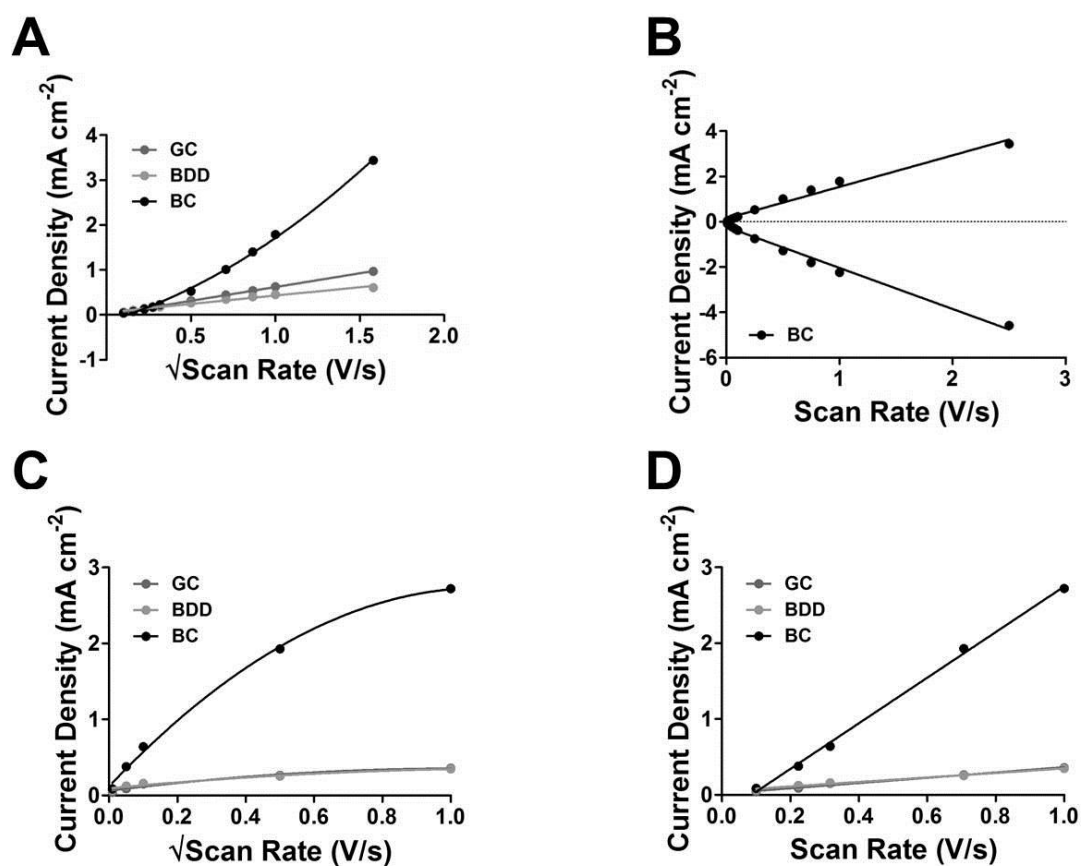

44

45 **Fig. S1.** The dependence of the anodic peak current for ferrocyanide and dopamine were  
46 investigated against scan rate and square root of scan rate. Responses for ferrocyanide are  
47 shown in (a) and (b) and the responses for dopamine are shown in (c and d). All data shown  
48 as the mean  $\pm$  S.E.M.,  $n = 3$ .

49
